# Supplementary material for: Highly enhanced transverse plasmon resonance and tunable double Fano resonances in gold@titania nanorods
Source: Royal Society of Chemistry journal article supplement (doi:10.1039/c5nr08521g), 2016-01-01
Supplement: c5nr08521g1.pdf [file c5nr08521g1.pdf]

## Electronic Supplementary Information

### **Highly enhanced transverse plasmon resonance and tunable double Fano resonances in gold@titania nanorods**

*Qifeng Ruan,<sup>†a</sup> Caihong Fang,<sup>†a</sup> Ruibin Jiang,<sup>a</sup> Henglei Jia,<sup>a</sup> Yunhe Lai,<sup>a</sup> Jianfang Wang<sup>\*a,b</sup>  
and Hai-Qing Lin<sup>c</sup>*

<sup>a</sup>Department of Physics, The Chinese University of Hong Kong, Shatin, Hong Kong SAR, China. E-mail: jfwang@phy.cuhk.edu.hk

<sup>b</sup>Shenzhen Research Institute, The Chinese University of Hong Kong, Shenzhen 518057, China

<sup>c</sup>Beijing Computational Science Research Center, Beijing 100094, China

<sup>†</sup>Contributed equally to this work.

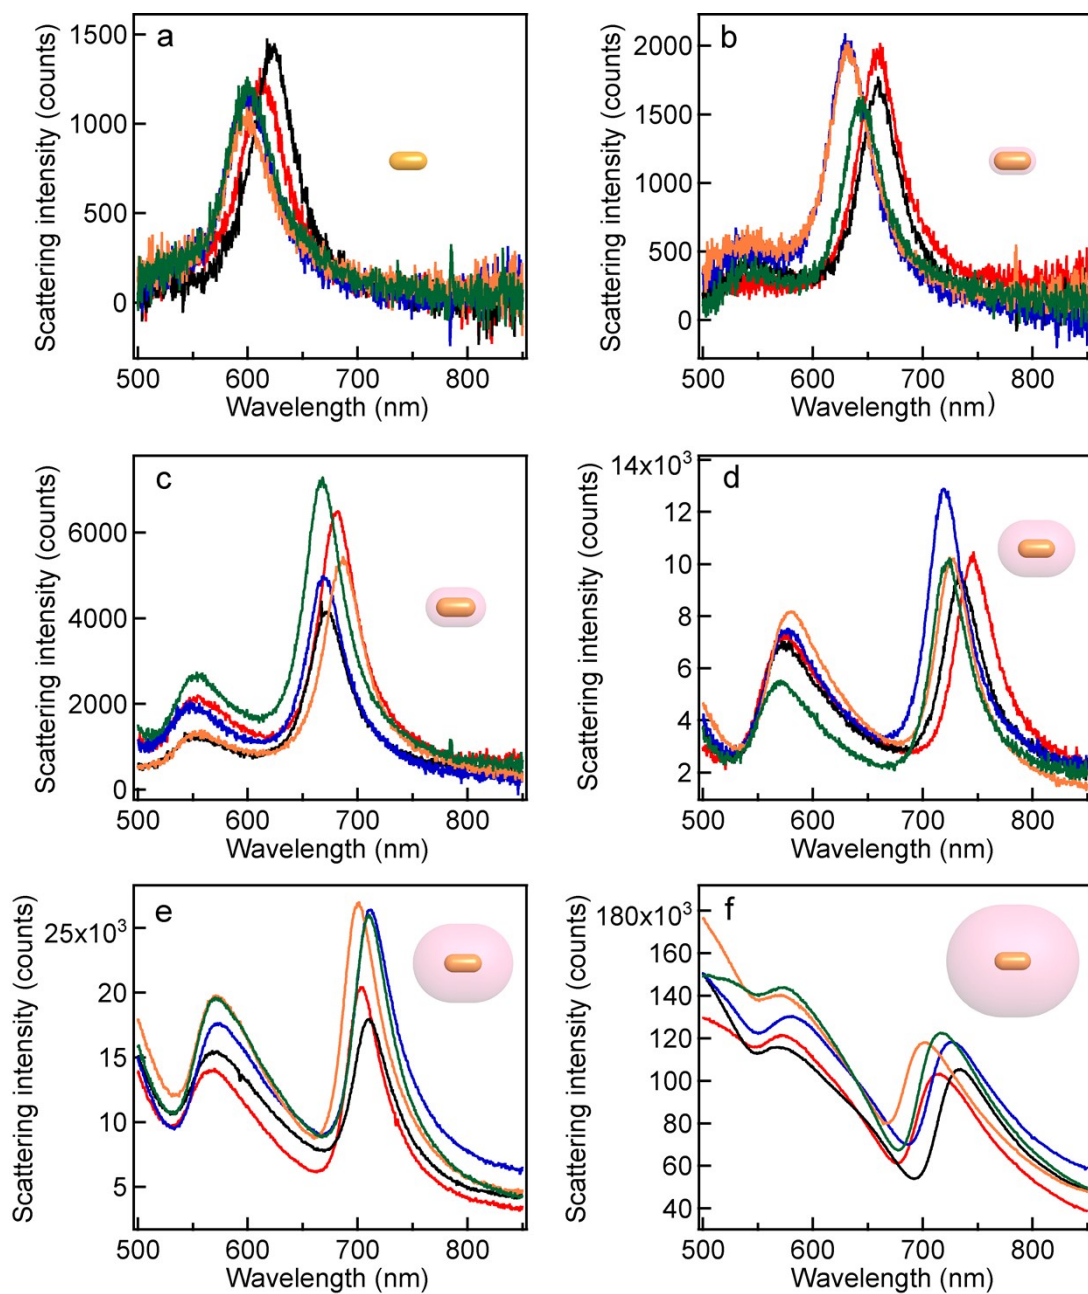

**Fig. S1** Single-particle scattering spectra of the uncoated Au nanorod and Au@TiO<sub>2</sub> nanorod samples. (a) Au nanorods. (b–f) Au@TiO<sub>2</sub> nanorod samples with shell thicknesses of  $12 \pm 2$ ,  $20 \pm 2$ ,  $43 \pm 4$ ,  $59 \pm 6$  and  $104 \pm 10$  nm, respectively. The insets are the structural illustrations of the corresponding nanorods.

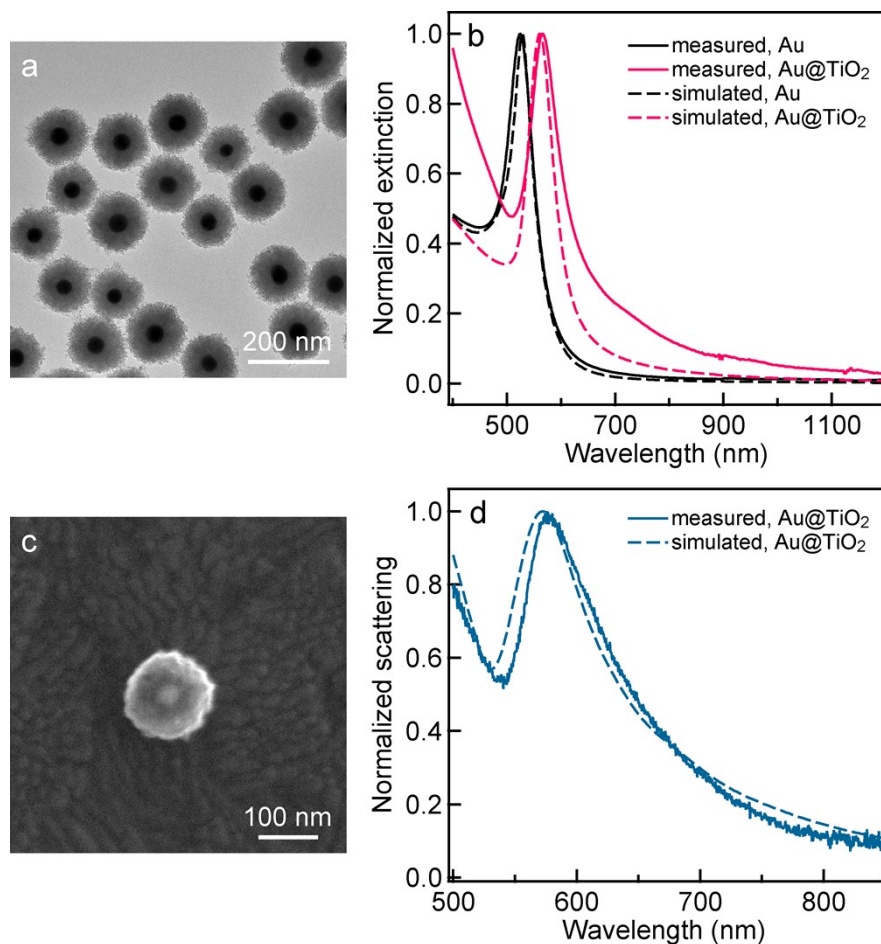

**Fig. S2** Analyses on the Au@TiO<sub>2</sub> nanospheres. (a) TEM image of the Au@TiO<sub>2</sub> nanosphere sample. The average diameter of the Au nanosphere cores and the average thickness of the TiO<sub>2</sub> shell are  $41 \pm 3$  nm and  $49 \pm 4$  nm, respectively. (b) Measured and simulated extinction spectra of the uncoated Au nanosphere and Au@TiO<sub>2</sub> nanosphere samples. (c) SEM image of a representative Au@TiO<sub>2</sub> nanosphere. (d) Measured and FDTD-simulated scattering spectra of the Au@TiO<sub>2</sub> nanosphere. The spectra in (b) and (d) are normalized for the purpose of comparison. In the FDTD simulation of the scattering spectrum in (d), the Au@TiO<sub>2</sub> nanosphere was placed on the ITO substrate. The diameter of the Au nanosphere core was set at 41 nm, and the thickness of the TiO<sub>2</sub> shell was set at 49 nm. The ITO substrate was also taken into account, with its refractive index set at 1.9. The index of the surrounding ambient environment was set at 1.0.

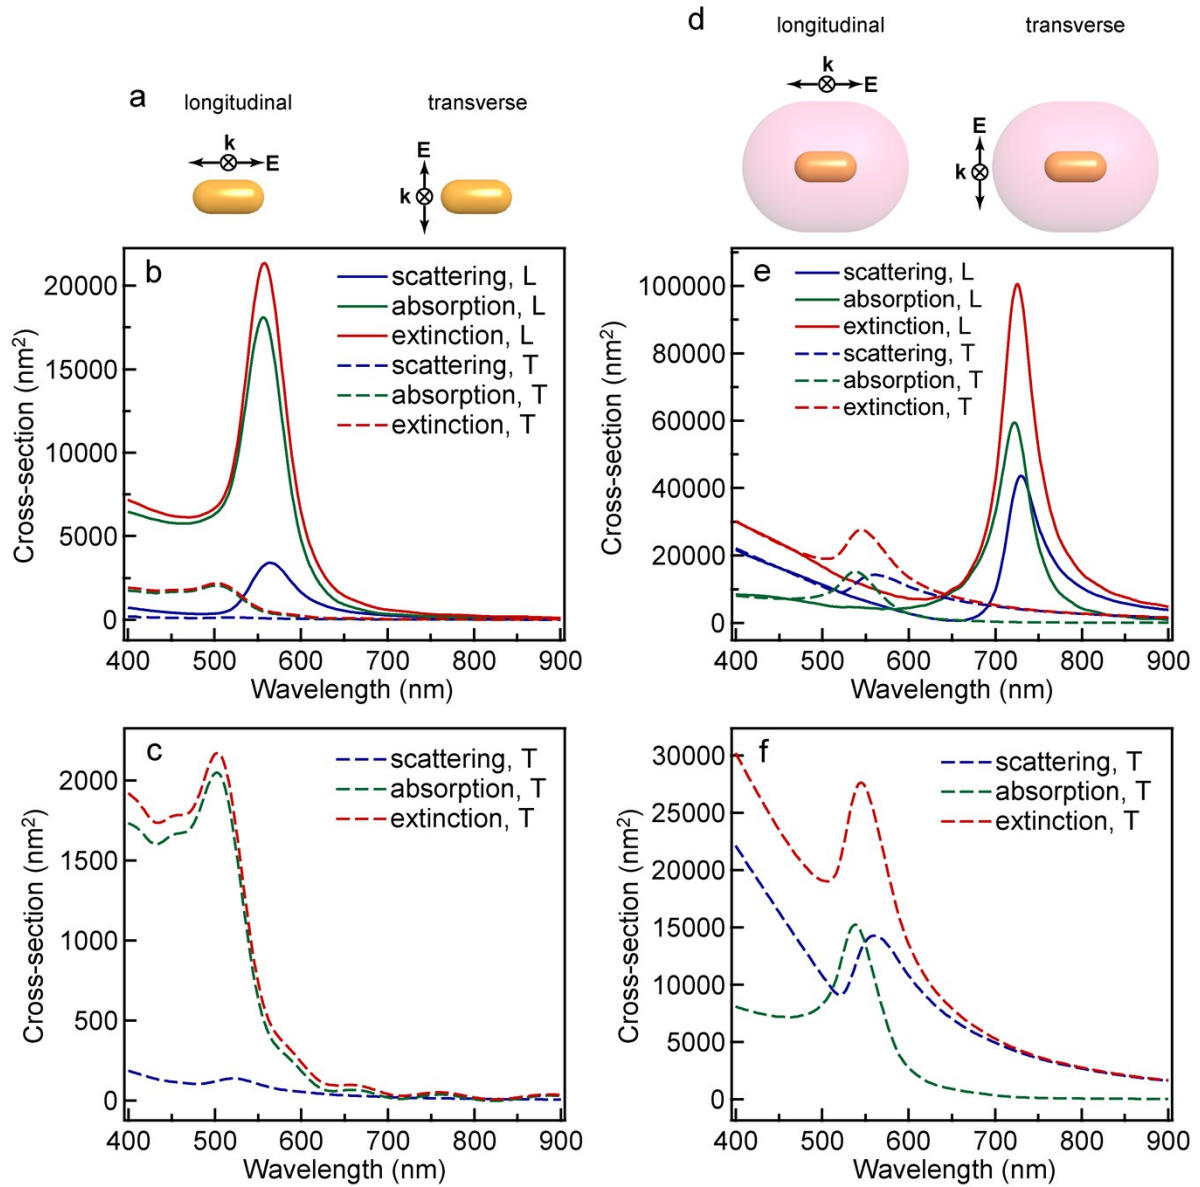

**Fig. S3** FDTD-simulated scattering, absorption and extinction spectra of the uncoated Au nanorod and Au@TiO<sub>2</sub> nanorod. (a) Schematics illustrating the setups of the light source for the longitudinal and transverse excitations, respectively. (b) Simulated scattering, absorption and extinction spectra of the Au nanorod with either the longitudinal (L) or transverse (T) excitation. The spectra for the transverse excitation are magnified in (c). (d–f) Similar data for the Au@TiO<sub>2</sub> nanorod with a shell thickness of 60 nm.

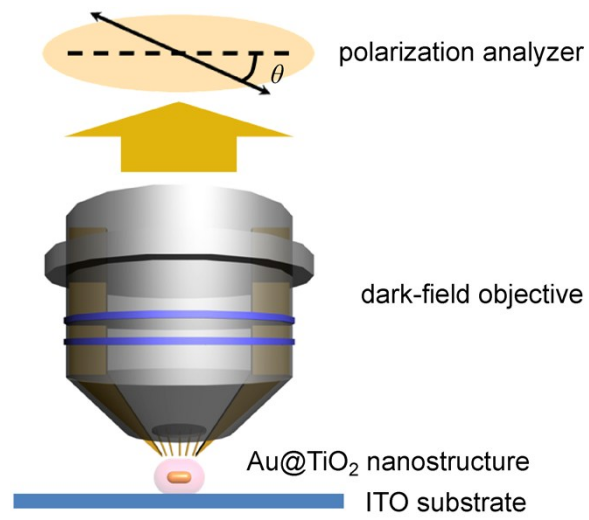

**Fig. S4** Schematic illustrating the setup for measuring the polarization-dependent scattering spectra of the individual Au@TiO<sub>2</sub> nanorods.

**Table S1** Parameters obtained from fitting the FDTD-simulated scattering spectra of the Au@TiO<sub>2</sub> nanorods with the coupled oscillator model

|                  | $\omega_1$ | $\omega_2$ | $\nu_{12}$         | $\gamma_1$ | $\gamma_2$ | $F_1$ | $F_2$  | $R^2$  |
|------------------|------------|------------|--------------------|------------|------------|-------|--------|--------|
|                  | (eV)       | (eV)       | (eV <sup>2</sup> ) | (eV)       | (eV)       | (eV)  | (eV)   |        |
| 10T <sup>a</sup> | 2.348      | 3.448      | 0.151              | 0.255      | 3.076      | 0.932 | 25.364 | 0.9994 |
| 20T              | 2.323      | 3.304      | 0.245              | 0.245      | 2.923      | 0.975 | 38.457 | 0.9994 |
| 40T              | 2.295      | 3.096      | 0.242              | 0.239      | 2.871      | 0.743 | 81.853 | 0.9997 |
| 60T              | 2.277      | 2.857      | 0.202              | 0.240      | 2.890      | 0.241 | 146.06 | 0.9998 |
| 100T             | 2.205      | 2.924      | 0.077              | 0.212      | 4.240      | 0.000 | 519.21 | 0.9935 |
| 10L              | 2.019      | 2.869      | 0.963              | 0.103      | 2.287      | 3.981 | 23.302 | 0.9998 |
| 20L              | 1.926      | 2.622      | 1.186              | 0.041      | 1.552      | 2.756 | 22.144 | 0.9996 |
| 40L              | 1.765      | 2.894      | 0.691              | 0.087      | 2.528      | 3.170 | 70.141 | 0.9996 |
| 60L              | 1.722      | 2.776      | 0.521              | 0.092      | 2.751      | 0.476 | 143.98 | 0.9997 |
| 100L             | 1.679      | 2.611      | 0.296              | 0.125      | 2.518      | 0.000 | 333.16 | 0.9961 |

<sup>a</sup>The numbers in the leftmost column indicate the shell thicknesses in the unit of nanometers. T and L represent the cases for the transverse and longitudinal excitations, respectively.
